# Supplementary material for: Low-Cost 3D Printers Enable High-Quality and Automated Sample Preparation and Molecular Detection
Source: PLoS One. 2016 Jun 30;11(6):e0158502. doi: 10.1371/journal.pone.0158502 (PMC4928953; doi:10.1371/journal.pone.0158502)
Supplement: S1 Appendix — (PDF) [file pone.0158502.s001.pdf]

**S1 Appendix. G-code for automated NA extraction.**

; Printrbot Simple

G21

;;;;;;;;;;;;;

G90

G01 X75.50 Y145 Z84 F2500

@pause Please attach MPPA

;;;;;;;;;;;;;

;Start program

G90

G01 Z77.5 F2500

M140 S70

;Check alignment row

G91

G01 Z-20

G01 Z16

G01 Y-9

;Lysis (30 sec)

G01 Z-7

G01 F20 Z-9

G4 S30

G01 F2500 Z16

;Start Washing

G01 Y-18

;Wash in buffer 1 (10 sec)

G01 Z-16

G00 Y-0.5

G00 Y1

G00 Y-1

[illegible]

[illegible]

[illegible]

[illegible]



[illegible]

[illegible]

[illegible]

[illegible]

[illegible]



[illegible]

[illegible]

[illegible]

[illegible]



[illegible]

[illegible]

[illegible]

[illegible]

[illegible]

```
;Wash in buffer 3 (10 sec)
```

[illegible]

[illegible]

[illegible]

[illegible]



[illegible]

[illegible]



[illegible]

[illegible]

[illegible]

[illegible]

[illegible]

[illegible]

[illegible]

[illegible]

[illegible]

[illegible]

[illegible]

[illegible]
